# Supplementary material for: Response mechanisms to acid stress promote LF82 replication in macrophages
Source: PubMed Central journal article supplement (PMC10595154; doi:10.3389/fcimb.2023.1255083), 2023-10-10
Supplement: DataSheet_2.pdf [file DataSheet_2.pdf]

|                                  |           |            |           |
|----------------------------------|-----------|------------|-----------|
| <i>ΔgadA</i>                     | 8.2±0.72  | 7.89±1.22  | 0.96±0.06 |
| <i>ΔgadA+pgadA</i>               | 8.3±1.05  | 25.83±2.1  | 3.15±0.5  |
| <i>ΔhdeA</i>                     | 10.93±0.5 | 16.57±1.8  | 1.52±0.17 |
| <i>ΔhdeA+phdeA</i>               | 9.03±1.46 | 28.97±7.5  | 3.17±0.34 |
| <i>ΔhdeB</i>                     | 9.6±1.06  | 13.86±2.64 | 1.44±0.14 |
| <i>ΔhdeB+phdeB</i>               | 10±1.04   | 31.2±1.65  | 3.13±0.16 |
| Acid neutralization              | T1        | T24        | T24/T1    |
| WT-NH <sub>4</sub> Cl            | 6.2±0.2   | 6.29±0.43  | 1.01±0.04 |
| <i>Δasr</i> -NH <sub>4</sub> Cl  | 6.73±0.23 | 6.74±0.47  | 1±0.04    |
| <i>ΔgadA</i> -NH <sub>4</sub> Cl | 8.6±0.92  | 7.15±1.15  | 0.84±0.15 |
| <i>ΔhdeA</i> -NH <sub>4</sub> Cl | 9.8±0.4   | 10.3±0.35  | 1.05±0.04 |
| <i>ΔhdeB</i> -NH <sub>4</sub> Cl | 9.27±0.42 | 9.72±0.91  | 1.05±0.06 |
| WT-CQ                            | 4.53±0.95 | 3.67±0.69  | 0.81±0.02 |
| <i>Δasr</i> -CQ                  | 3.8±0.69  | 2.85±0.3   | 0.76±0.09 |
| <i>ΔgadA</i> -CQ                 | 7±0.69    | 5.96±0.66  | 0.86±0.15 |
| <i>ΔhdeA</i> -CQ                 | 8±1.4     | 6.41±1.06  | 0.8±0.01  |
| <i>ΔhdeB</i> -CQ                 | 8.4±1.4   | 7.02±1.27  | 0.84±0.02 |

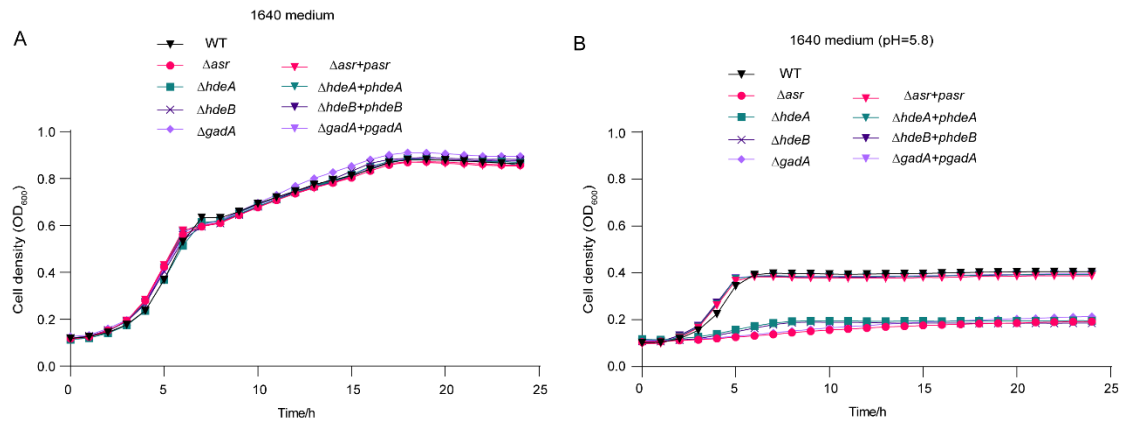

Figure S3 (A) Growth curve of *Δasr*, *Δasr+pasr*, *ΔgadA*, *ΔgadA+pgadA*, *ΔhdeA*, *ΔhdeA+phdeA*, *ΔhdeB*, *ΔhdeB+phdeB* and WT in 1640 medium. (B) Growth curve of *Δasr*, *Δasr+pasr*, *ΔgadA*, *ΔgadA+pgadA*, *ΔhdeA*, *ΔhdeA+phdeA*, *ΔhdeB*, *ΔhdeB+phdeB* and WT in 1640 medium (pH=5.8).

Table S4 Viable bacteria of WT and mutants of LF82 treated with or without nitrate at 1 h p.i. and 24 h p.i. within Raw 264.7 macrophages.

| Strains              | 10 <sup>5</sup> CFU/Well |            |            |
|----------------------|--------------------------|------------|------------|
|                      | T1                       | T24        | T24/T1     |
| WT                   | 6.87±0.58                | 21.37±1.05 | 3.12±0.15  |
| <i>ΔnarXL</i>        | 7.93±0.83                | 8.23±1.07  | 1.04±0.04  |
| <i>ΔnarXL+pnarXL</i> | 7.3±1.11                 | 22.93±2.88 | 3.15±0.12  |
| <i>Δnark</i>         | 6.8±0.87                 | 8.57±0.72  | 1.26±0.05  |
| <i>ΔnarK+pnarK</i>   | 6.37±0.91                | 20.13±2.92 | 3.16±0.07  |
| <i>Δhmp</i>          | 6.47±1.17                | 5.57±1.42  | 0.85±0.06  |
| <i>Δhmp+phmp</i>     | 6.47±1.22                | 19.77±5.15 | 3.03±0.22  |
| <i>ΔnarP</i>         | 6.63±1.83                | 7.55±2.44  | 1.13±0.06  |
| <i>ΔnarP+pnarP</i>   | 7.13±1.8                 | 21.5±4.33  | 3.04±0.15  |
| Nitrate              | T1                       | T24        | T24/T1     |
| WT                   | 5.33±0.81                | 54±7.55    | 10.14±0.12 |
| <i>ΔnarXL</i>        | 6.73±0.99                | 6.97±1.25  | 1.03±0.07  |
| <i>ΔnarXL+pnarXL</i> | 6.2±1.25                 | 63.67±4.25 | 10.47±1.64 |
| <i>Δnark</i>         | 6.33±1.21                | 8.17±0.86  | 1.3±0.11   |
| <i>ΔnarK+pnarK</i>   | 6.73±1.34                | 69.33±2.08 | 10.57±2.03 |
| <i>Δhmp</i>          | 7.6±2.62                 | 6.7±2.19   | 0.89±0.03  |
| <i>Δhmp+phmp</i>     | 6.63±0.57                | 69.67±1.53 | 10.54±0.7  |
| <i>Δnarp</i>         | 5.67±0.61                | 6.73±0.42  | 1.19±0.08  |
| <i>ΔnarP+pnarP</i>   | 7.2±2.55                 | 71.17±5.84 | 10.47±2.49 |

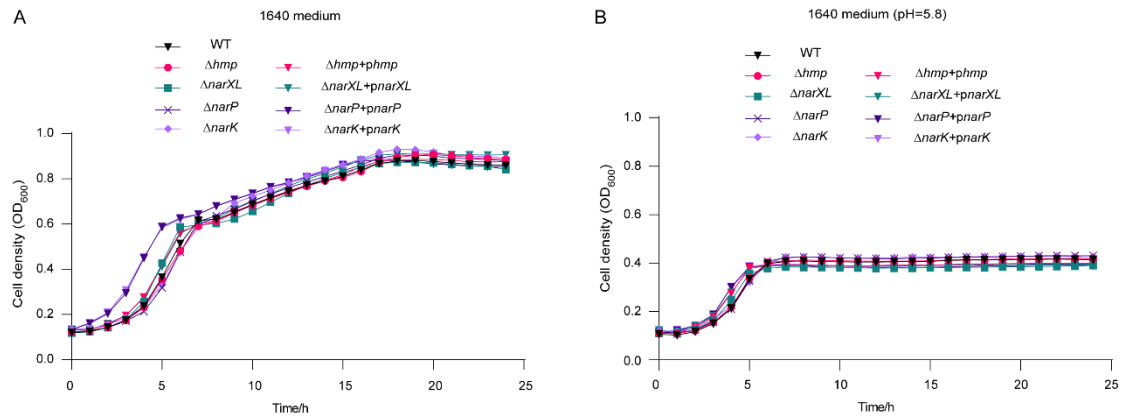

Figure S4 (A) Growth curve of *narK*,  $\Delta narK+pnarK$ , *narXL*,  $\Delta narXL+pnarXL$ , *narP*,  $\Delta narP+pnarP$ , *hmp*,  $\Delta hmp+phmp$  and WT in 1640 medium. (B) Growth curve of *narK*,  $\Delta narK+pnarK$ , *narXL*,  $\Delta narXL+pnarXL$ , *narP*,  $\Delta narP+pnarP$ , *hmp*,  $\Delta hmp+phmp$  and WT in 1640 medium (pH=5.8).

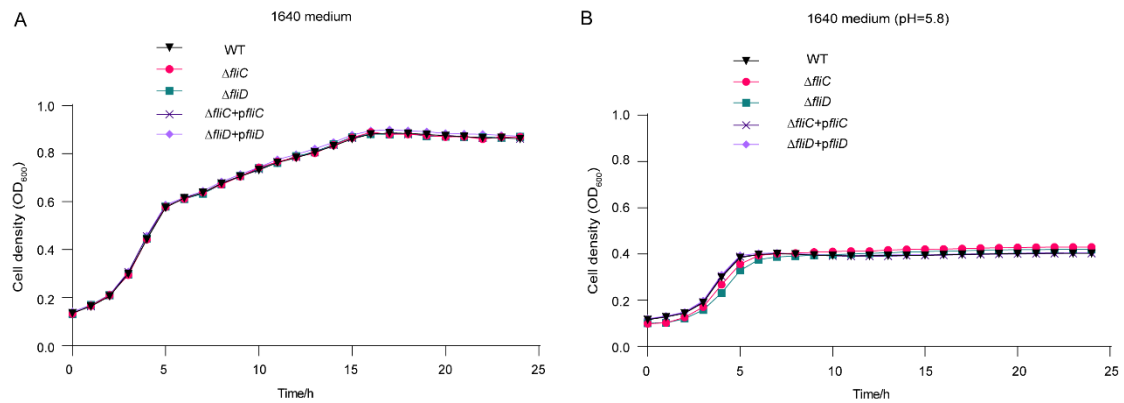

Figure S5 (A) Growth curve of  $\Delta fliC$ ,  $\Delta fliD$  and WT in 1640 medium. (B) Growth curve of *fliC*, *fliD* and WT in 1640 medium (pH=5.8).

Table S5 Viable bacteria of WT and  $\Delta fliC$ ,  $\Delta fliD$  mutants of LF82 at 1 h p.i. and 24 h p.i. within Raw 264.7 macrophages.

| Strains       | 10 <sup>5</sup> CFU/Well |            |           |
|---------------|--------------------------|------------|-----------|
|               | T1                       | T24        | T24/T1    |
| WT            | 8.47±1.32                | 26.67±3.55 | 3.16±0.1  |
| $\Delta fliC$ | 8.3±1.06                 | 22.81±0.23 | 2.78±0.35 |
| $\Delta fliD$ | 7.93±1.31                | 23.95±1.36 | 3.05±0.32 |
